# Supplementary material for: Molten salt strategy and plasma technology induced MnO2 with oxygen vacancy for high performance Zn-ion batteries
Source: Royal Society of Chemistry journal article supplement (doi:10.1039/d1nj03934b), 2021-01-01
Supplement: d1nj03934b1.pdf [file d1nj03934b1.pdf]

## Supporting information

### **Molten salt strategy and plasma technology induced MnO<sub>2</sub> with oxygen vacancy for high performance Zn-ions battery**

Fuqiang Shao<sup>1</sup>, Shuke Li<sup>1</sup>, Yanchao Xu<sup>1</sup>, Yang Jiao<sup>1\*</sup>, Jianrong Chen<sup>1\*</sup>

**\*Corresponding author:** E-mail: [yangjiao@zjnu.edu.cn](mailto:yangjiao@zjnu.edu.cn) and [cjr@zjnu.cn](mailto:cjr@zjnu.cn), **Phone:**  
(+86)-0579-82291275

<sup>1</sup> College of Geography and Environmental Sciences, Zhejiang Normal University,  
Jinhua, 321004, China

## Calculation

According to the reported literature<sup>1, 2</sup>, the current ( $i$ ) and scan rate ( $v$ ) in CV curves have relationships with equation:

$$i = av^b \quad (1)$$

$$\lg(i) = b\lg(v) + \lg(a) \quad (2)$$

where  $i$  is peak current,  $a$  correspond to constant,  $v$  is the scan rate and  $b$  is equaled to the slope of the  $\lg(v)$ - $\lg(i)$  plots. If  $b$  approximately equals to 0.5, suggests the diffusion process is dominant, while a capacitive behavior will dominate when  $b$  is about 1<sup>3</sup>.

The contribution ratios of the two processes at scan rates from 0.1 to 0.5 mV s<sup>-1</sup> can be calculated by equations (3):

$$i(v) = k_1v + k_2v^{1/2} \quad (3)$$

where  $k_1v$  and  $k_2v^{1/2}$  corresponds to the current contributions originating from the surface capacitive effects and the diffusion-controlled insertion processes, respectively. By determining the values of  $k_1$  and  $k_2$ , we can further analysis contribution ratios between diffusion-controlled process and capacitive effects at different scan rates. The Eq. (3) can be changed as follows:

$$i(v)/v^{1/2} = k_1v^{1/2} + k_2 \quad (4)$$

The values of  $k_1$  and  $k_2$  can be obtained from the slope and y intercept of the linear fit of the plot of  $i(v)/v^{1/2}$  versus  $v^{1/2}$ , respectively. The capacitive and diffusion-controlled currents assistance to the total charge was separately calculated by inserting the values of  $k_1$  and  $k_2$  into the Eq. (4).

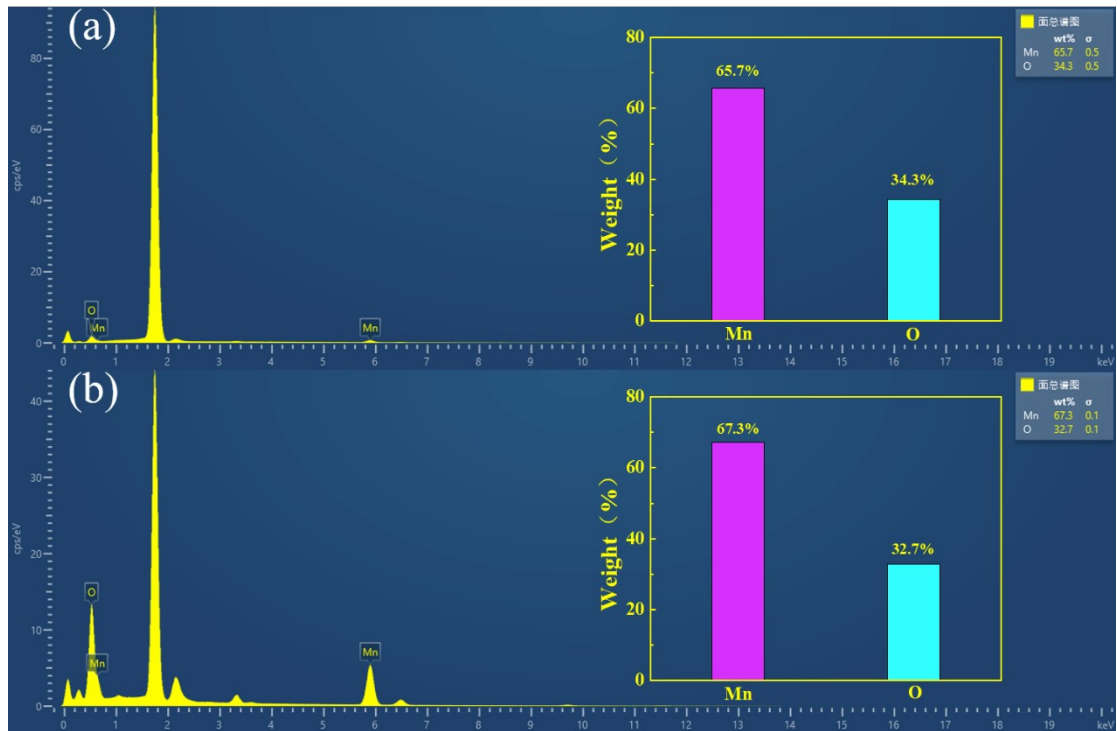

Figure S1. Elemental composition analysis of (a)  $\text{MnO}_2$  and (b)  $\text{MnO}_{2-3}$ .

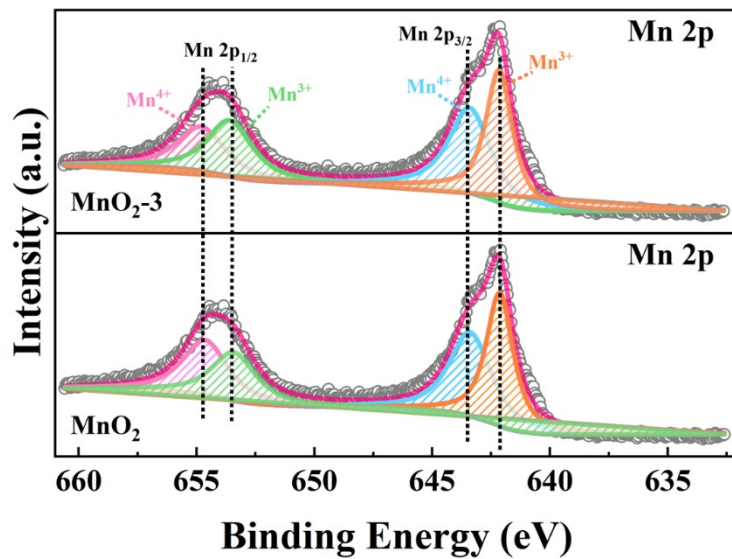

Figure S2. Mn 2p XPS spectra comparison of  $\text{MnO}_2$  and  $\text{MnO}_{2-3}$ .

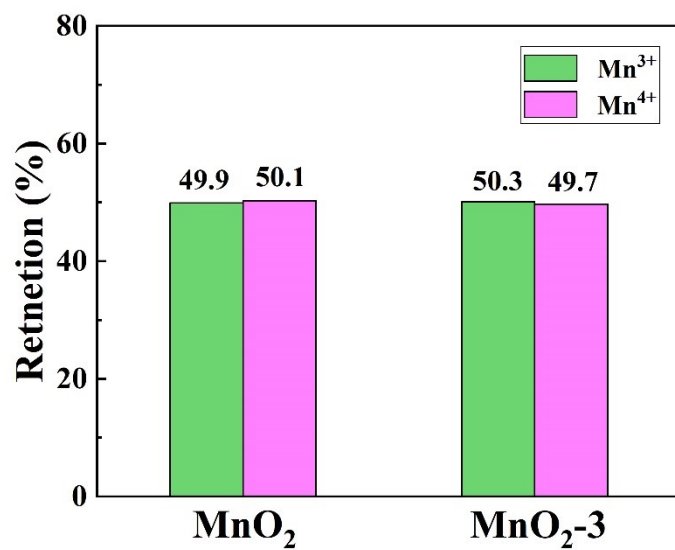

**Figure S3.** quantitatively statistics of the percentage of Mn<sup>3+</sup> and Mn<sup>4+</sup> in the samples.

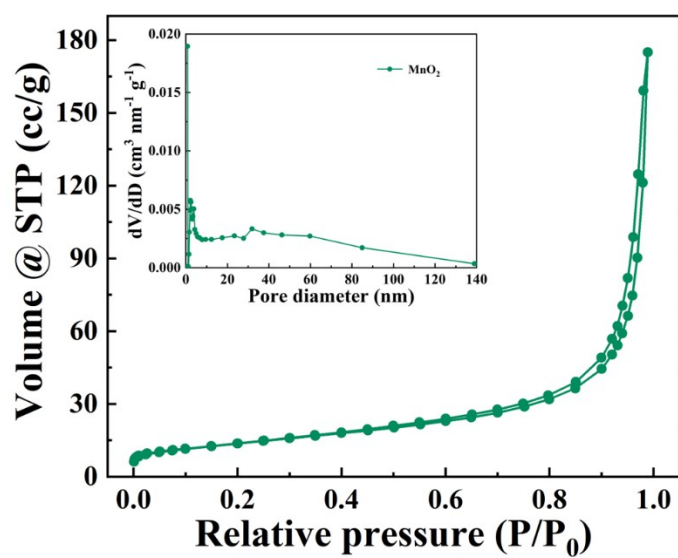

**Figure S4.** Nitrogen adsorption-desorption isotherm and pore distribution of MnO<sub>2</sub>.

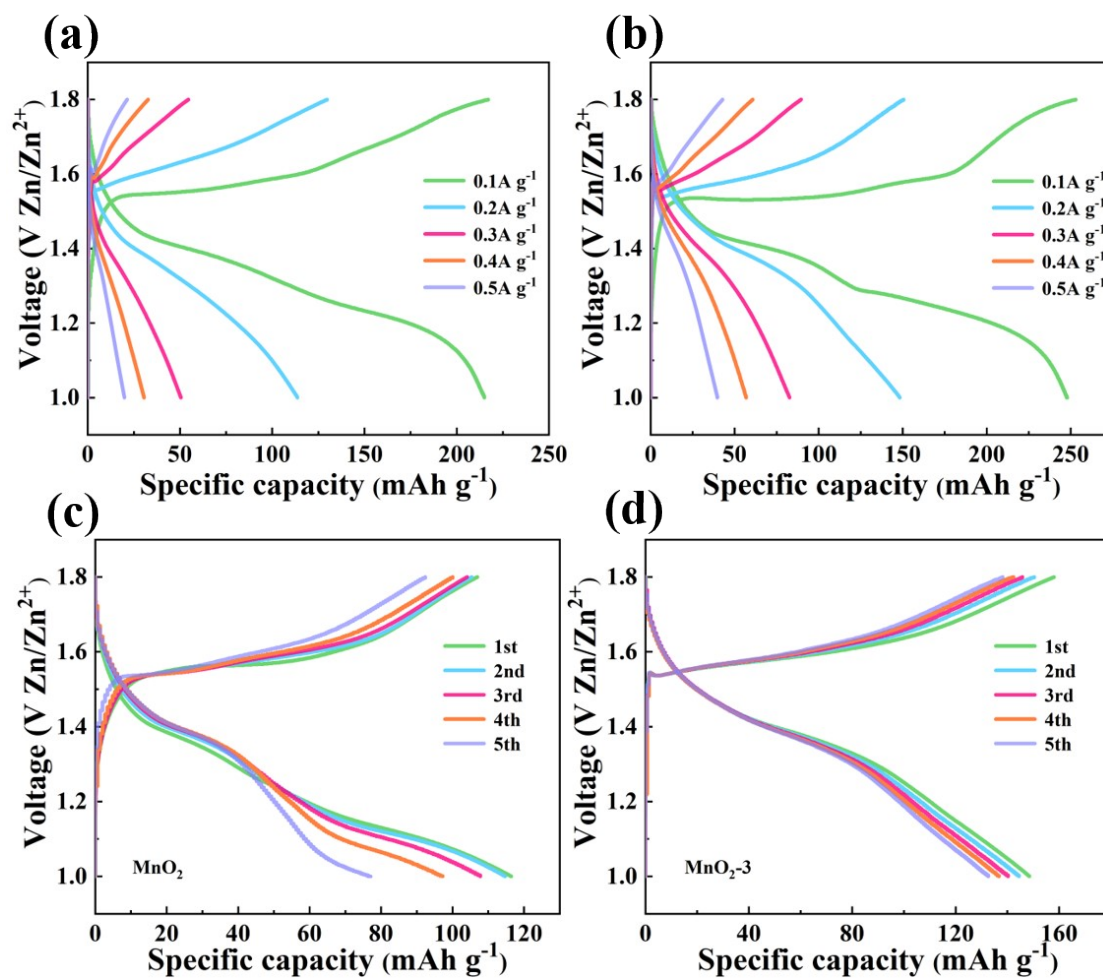

**Figure S5.** GCD curves at current densities from 0.1 to 0.5 A g<sup>-1</sup> of (a) MnO<sub>2</sub> and (b) MnO<sub>2</sub>-3.

GCD profiles in the initial 5 cycles of (c) MnO<sub>2</sub> and (d) MnO<sub>2</sub>-3.

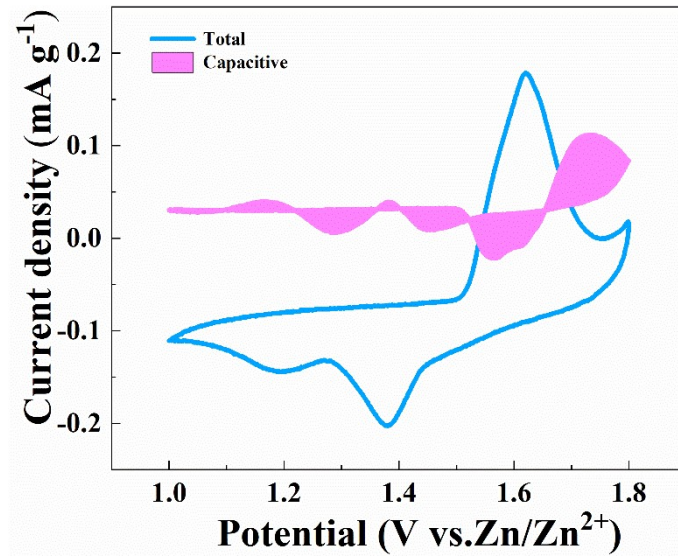

**Figure S6.** Capacitive and diffusion-controlled contribution analysis of the CV curves of MnO<sub>2</sub>-3.

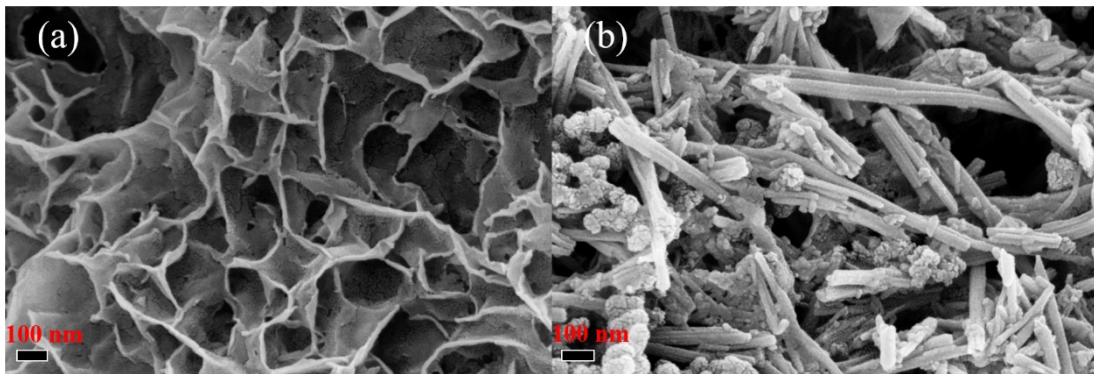

**Figure S7.** SEM images of (a) MnO<sub>2</sub> and (b) MnO<sub>2</sub>-3 after 10 cycles.

**Table S1.** Comparison of electrochemical performance of other materials

| <b>Materials</b>                | <b>Specific capacity<br/>(mA h g<sup>-1</sup>)</b> | <b>Cycle number</b>              | <b>Capacity<br/>retention</b> | <b>Referenc<br/>e</b> |
|---------------------------------|----------------------------------------------------|----------------------------------|-------------------------------|-----------------------|
| $\delta$ -MnO <sub>2</sub>      | 170 (0.1A g <sup>-1</sup> )                        | 100 (0.1 A g <sup>-1</sup> )     | 83%                           | 4                     |
| $\alpha$ -MnO <sub>2</sub> @PPy | 137 (0.1A g <sup>-1</sup> )                        | 100 (0.1 A g <sup>-1</sup> )     | 58%                           | 5                     |
| $\alpha$ -MnO <sub>2</sub>      | 180 (42 mA g <sup>-1</sup> )                       | 30 (42 mA g <sup>-1</sup> )      | 76%                           | 6                     |
| $\delta$ -MnO <sub>2</sub>      | 252 (82 mA g <sup>-1</sup> )                       | 100 (83 mA g <sup>-1</sup> )     | 44%                           | 7                     |
| $\delta$ -MnO <sub>2</sub>      | 108 (12.3 mA g <sup>-1</sup> )                     | 125 (12.3 mA g <sup>-1</sup> )   | 63%                           | 8                     |
| UCT-1-250                       | 222 (0.1A g <sup>-1</sup> )                        | 200 (0.1A g <sup>-1</sup> )      | 57%                           | 9                     |
| $\gamma$ - MnO <sub>2</sub>     | 250 (0.5 mA cm <sup>-2</sup> )                     | 40 (0.5 mA cm <sup>-2</sup> )    | 63%                           | 10                    |
| <b>This work</b>                | <b>252 (0.1A g<sup>-1</sup>)</b>                   | <b>100 (0.2A g<sup>-1</sup>)</b> | <b>81%</b>                    |                       |

## References

1. S. Xiong, M. Lin, L. Wang, S. Liu, S. Weng, S. Jiang, Y. Xu, Y. Jiao and J. Chen, *Applied Surface Science*, 2021, **546**.
2. S. Zhang, S. Long, H. Li and Q. Xu, *Chemical Engineering Journal*, 2020, **400**.
3. J. Long, F. Yang, J. Cuan, J. Wu, Z. Yang, H. Jiang, R. Song, W. Song, J. Mao and Z. Guo, *ACS Appl Mater Interfaces*, 2020, **12**, 32526-32535.
4. C. Guo, H. Liu, J. Li, Z. Hou, J. Liang, J. Zhou, Y. Zhu and Y. Qian, *Electrochimica Acta*, 2019, **304**, 370-377.
5. C. Guo, S. Tian, B. Chen, H. Liu and J. Li, *Materials Letters*, 2020, **262**.
6. B. Lee, H. R. Lee, H. Kim, K. Y. Chung, B. W. Cho and S. H. Oh, *Chem Commun (Camb)*, 2015, **51**, 9265-9268.
7. M. H. Alfaruqi, J. Gim, S. Kim, J. Song, D. T. Pham, J. Jo, Z. Xiu, V. Mathew and J. Kim, *Electrochemistry Communications*, 2015, **60**, 121-125.
8. S.-D. Han, S. Kim, D. Li, V. Petkov, H. D. Yoo, P. J. Phillips, H. Wang, J. J. Kim, K. L. More, B. Key, R. F. Klie, J. Cabana, V. R. Stamenkovic, T. T. Fister, N. M. Markovic, A. K. Burrell, S. Tepavcevic and J. T. Vaughey, *Chemistry of Materials*, 2017, **29**, 4874-4884.
9. Y. Wu, J. Fee, Z. Tobin, A. Shirazi-Amin, P. Kerns, S. Dissanayake, A. Mirich and S. L. Suib, *ACS Applied Energy Materials*, 2020, **3**, 1627-1633.
10. M. H. Alfaruqi, V. Mathew, J. Gim, S. Kim, J. Song, J. P. Baboo, S. H. Choi and J. Kim, *Chemistry of Materials*, 2015, **27**, 3609-3620.
